# Supplementary material for: Rituximab plus bendamustine or chlorambucil for chronic lymphocytic leukemia: primary analysis of the randomized, open-label MABLE study
Source: PubMed Central journal article supplement — Haematologica. 2018 Feb 1;103(4):698–706. doi: 10.3324/haematol.2017.170480 (PMC5865431; doi:10.3324/haematol.2017.170480), 2018-04

## Rituximab plus bendamustine or chlorambucil for chronic lymphocytic leukemia: primary analysis of the randomized, open-label MABLE study

Anne-Sophie Michallet,<sup>1</sup> Melih Aktan,<sup>2</sup> Wolfgang Hiddemann,<sup>3</sup> Osman Ilhan,<sup>4</sup> Peter Johansson,<sup>5</sup> Kamel Laribi,<sup>6</sup> Balkis Meddeb,<sup>7</sup> Carol Moreno,<sup>8</sup> João Raposo,<sup>9</sup> Anna Schuh,<sup>10</sup> Ali Ünal,<sup>11</sup> Tom Widenius,<sup>12</sup> Alf Bernhardt,<sup>13</sup> Kerstin Kellershohn,<sup>14</sup> Dimitri Messeri,<sup>13</sup> Stuart Osborne<sup>13</sup> and Véronique Leblond<sup>15</sup>

<sup>1</sup>Department of Hematology, CLCC Centre Léon Bérard, Lyon, France; <sup>2</sup>Istanbul Medical Faculty, Istanbul University, Turkey; <sup>3</sup>Department of Internal Medicine III, Ludwig-Maximilians University of Munich, Germany; <sup>4</sup>Department of Hematology, Ankara University School of Medicine, Turkey; <sup>5</sup>Department of Hematology, Uddevalla Hospital, Sweden; <sup>6</sup>Department of Hematology, Centre Hospitalier du Mans, Le Mans, France; <sup>7</sup>Hematology Department, Aziza Othmana University Hospital, Tunis, Tunisia; <sup>8</sup>Department of Hematology, Hospital de la Santa Creu i Sant Pau, Barcelona, Spain; <sup>9</sup>Hematology Service, Hospital de Santa Maria, Lisbon, Portugal; <sup>10</sup>Department of Oncology, Oxford University Hospitals, UK; <sup>11</sup>Department of Hematology, Erciyes University Medical School, Kayseri, Turkey; <sup>12</sup>Department of Internal Medicine, Peijas Hospital, Vantaa, Finland; <sup>13</sup>Product Development Medical Affairs, F. Hoffmann-La Roche Ltd., Basel, Switzerland; <sup>14</sup>Medical Affairs, Roche Pharma AG, Grenzach-Wyhlen, Germany and <sup>15</sup>Clinical Hematology, AP-HP Hôpital Pitié-Salpêtrière, UPMC University, Paris, France

©2018 Ferrata Storti Foundation. This is an open-access paper. doi:10.3324/haematol.2017.170480

Received: August 2, 2017.

Accepted: January 22, 2018.

Pre-published: February 1, 2018.

Correspondence: veronique.leblond@aphp.fr

---

## Supplementary information

### Contents

- Patient inclusion and exclusion criteria, and protocol amendments affecting patient eligibility
- Supplementary methods
- Efficacy in 2L patients
- Table S1. Demographic characteristics for the pooled 1L and 2L populations
- Table S2. Active medical conditions in 1L patients
- Table S3. CRs at Cycle 6 in 2L patients and the pooled population
- Table S4. MRD at the confirmation-of-response visit in 2L patients
- Figure S1. PFS and OS results in 2L patients

### Patient inclusion and exclusion criteria, and protocol amendments affecting patient eligibility

#### ***Inclusion criteria***

Patients who met all of the following inclusion criteria were included in this study:

1. Signed and dated written informed consent
2. Aged 18 years or older
3. Tumor cell phenotype consistent with chronic lymphocytic leukemia (CLL) by cell surface marker analyses: CD5+, CD19+, and CD23+ (as per local confirmation of diagnosis)
4. Patients with active CLL (Binet B and C) who required therapy per criteria according to the National Cancer Institute criteria 2008. Symptomatic Binet A patients and/or patients with low/intermediate Rai stages could also be included
5. Eastern Cooperative Oncology Group performance status  $\leq 2$
6. Ineligible for treatment with fludarabine

7. A negative serum pregnancy test within 1 week before the first cycle of treatment must have been available for women who were 2 years after the onset of menopause and not sterilized surgically

**Exclusion criteria**

Patients who met any of the following exclusion criteria were not included in this study:

1. From amendment No. 2, patients treated second-line (2L) were not allowed to be entered in the study
2. Any other concomitant anti-cancer therapy. Corticosteroids were allowed if they were given for reasons other than CLL and the dose was  $\leq 20$  mg of prednisolone equivalent per day
3. Patients with transformation to aggressive B-cell malignancy
4. Known or suspected central nervous system involvement of CLL
5. Any other malignancy within 5 years prior to enrollment except curatively treated carcinoma *in situ* of the cervix, squamous cell carcinoma of the skin, or basal cell skin cancer. Cervical carcinoma stage 1B or less, breast cancer *in situ*, or localized prostate cancer stage T1c or less was to be considered, provided that the patient was treated with curative intent and was relapse-free for at least 2 years prior to enrollment
6. Major surgery (excluding lymph node biopsy) within 28 days prior to first cycle of study treatment
7. Chronic or ongoing active infectious disease requiring systemic treatment
8. History of clinically significant cerebrovascular disease with residual sequelae
9. Patients who had known HIV, active hepatitis B virus, or hepatitis C virus infection
10. Serious underlying medical conditions that could have impaired the ability of the patient to participate in the study

11. Inadequate renal and hepatic function per the following laboratory values: creatinine clearance  $<30$  mL/min, total bilirubin  $>1.5$  x upper limit of normal (ULN), alanine aminotransferase and/or aspartate aminotransferase  $>2.5$  x ULN, and alkaline phosphatase  $>2.5$  x ULN
12. Inadequate hematologic function, defined as absolute neutrophil count  $<1.0 \times 10^9/l$  ( $1000/\mu l$ ), platelet count  $<50 \times 10^9/l$  ( $50,000/\mu l$ ), or hemoglobin  $<9.0$  g/dl, unless due to involvement of bone marrow (BM) by CLL
13. Known or suspected hypersensitivity to components of investigational product
14. Life expectancy less than 6 months
15. Patients known or suspected of not being able to comply with a study protocol
16. Pregnant or breast-feeding patients
17. Male and female patients with reproductive potential who were not willing to use an effective method of contraception during the study and 1 year after last dose of study medication
18. Patients unable to provide informed consent
19. Patients with severe autoimmune cytopenia as assessed by the physician (Coombs positive patients without clinical signs of autoimmune hemolytic anemia were eligible for study entry)
20. Patients who had received any investigational treatment within 30 days before screening
21. Medical condition requiring chronic use of oral corticosteroids in doses  $>20$  mg of prednisolone equivalent/day. Inhaled or topical steroids were permitted

***Protocol amendments affecting patient eligibility***

1. Inclusion of patients with Binet stage A disease that required treatment
2. Exclusion of 2L patients

These protocol changes were not considered to have had a meaningful impact on the data of the overall population throughout the study.

## **Supplementary methods**

### ***Investigator assessment of ineligibility for fludarabine-based treatment***

Assessment of ineligibility for fludarabine-based treatment was based on one or more of the following: a history of opportunistic infections; repeated grade 3/4 infections of other types; severe impairment of BM function other than underlying CLL (e.g., thrombocytopenia, anemia, or granulocytopenia); immunodeficiency; age >75 years (because data on the use of fludarabine in this age group are limited); a history of autoimmune processes or positive Coombs test status; autoimmune phenomena (e.g., autoimmune hemolytic anemia, autoimmune thrombocytopenia, thrombocytopenic purpura, pemphigus, or Evan's syndrome); and severe renal impairment.

### ***Assessments***

#### *Genetic profiling*

Baseline peripheral blood (PB) samples were assessed for CLL-related chromosomal abnormalities (fluorescent *in situ* hybridization), immunoglobulin variable-region heavy chain (IgVH) mutational status (sequencing), and ZAP-70 and CD38 levels (immunophenotyping/polymerase chain reaction [PCR]).

#### *Tumor response*

Response was assessed after Cycle (C)3 and C6 as per International Workshop on CLL (iwCLL) 2008 guidelines.<sup>1</sup> Patients with complete response (CR), CR unconfirmed, or partial response (PR) after C6 had a follow-up confirmatory assessment 12 weeks later (8 weeks for patients treated according to protocol v1.0). BM aspirate and biopsy assessment were required for CR confirmation. Response was also assessed in the rituximab plus chlorambucil (R-Clb) arm at C12, with treatment being discontinued for patients showing evidence of CR during C7-C12. A follow-up confirmatory assessment was performed 12 weeks later (8 weeks for patients treated according to protocol v1.0).

### *Progression-free survival (PFS) and overall survival (OS)*

PFS was defined as the interval from the study treatment start to the date of site investigator-confirmed progressive disease/death by any other cause. OS was defined as the interval from the study treatment start to the date of death by any cause.

### *Minimal residual disease (MRD)*

MRD was analyzed centrally according to international guidelines using an allele-specific oligonucleotide (ASO)-PCR assay.<sup>2,3</sup> MRD was assessed in PB at baseline. For patients with CR/PR after C6, MRD was analyzed in BM aspirates (or PB when BM was unavailable) at the confirmation-of-response visit. MRD negativity was defined as a ratio of malignant B-cells to white blood cells of  $<10^{-4}$ .

### *Safety*

Adverse events (AEs) were graded according to the National Cancer Institute Common Terminology Criteria for AEs v4.0 and coded according to the Medical Dictionary for Regulatory Activities v17.0.

### ***Statistical analysis***

The null hypothesis was confirmed if the CR rate after C6 with rituximab plus bendamustine (R-B) was  $\leq$  the CR rate with R-Clb. For first-line (1L) patients, the difference between arms was tested using a one-sided continuity-corrected chi-square test; the significance level for the primary endpoint was defined as  $\alpha_2=0.048$  using the O'Brien–Fleming approach. For 2L patients, the difference was tested using a two-sided Fisher's exact test. An interim analysis was performed when 100 patients completed C6 plus 12 weeks (8 weeks for patients treated according to protocol v1.0) for their confirmation assessment using a significance level of  $\alpha_1=0.0052$ .

An exploratory logistic regression analysis assessed the influence of baseline covariates (Binet stage, IgVH mutational status, 17p/11q deletion, and Eastern Cooperative Oncology Group performance status) on treatment outcome. When adjusting for covariates, the odds ratio for treatment was estimated and the *P*-value of the Wald test was derived. Disease response and safety data were summarized using descriptive statistics.

A two-sided continuity-corrected chi-square test assessed differences between arms in overall response rates (ORRs) and molecular responses. PFS and OS were summarized by Kaplan–Meier estimates. Log-rank test *P*-values were used to compare treatment arms. Hazard ratios (HRs) and 95% confidence intervals (CIs) were calculated based on the Cox proportional hazard model, with and without baseline Binet stage as a covariate.

## **References**

1. Hallek M, Cheson BD, Catovsky D, et al. Guidelines for the diagnosis and treatment of chronic lymphocytic leukemia: a report from the International Workshop on Chronic Lymphocytic Leukemia updating the National Cancer Institute-Working Group 1996 guidelines. *Blood*. 2008;111(12):5446-5456.
2. van der Velden VH, Hochhaus A, Cazzaniga G, Szczepanski T, Gabert J, van Dongen JJ. Detection of minimal residual disease in hematologic malignancies by real-time quantitative PCR: principles, approaches, and laboratory aspects. *Leukemia*. 2003;17(6):1013-1034.
3. van der Velden VH, Cazzaniga G, Schrauder A, et al. Analysis of minimal residual disease by Ig/TCR gene rearrangements: guidelines for interpretation of real-time quantitative PCR data. *Leukemia*. 2007;21(4):604-611.

### **Efficacy in 2L patients**

In 2L patients (n=116), the CR rate after C6 was higher in the R-B group (16% vs. 2%;  $P=0.008$ ; Table S3). ORRs at the end of rituximab treatment were similar (R-B, 88%; R-C1b, 83%;  $P=0.654$ ).

A 9-month extension in median PFS was observed for R-B *versus* R-C1b (26.0 months vs. 16.9 months; HR [adjusted for baseline Binet stage] 0.701, 95% CI 0.431-1.138;  $P=0.151$ ; Figure S1A); median OS was not significantly different (not reached [NR] vs. 40.3 months; HR [adjusted for baseline Binet stage] 0.682, 95% CI 0.318-1.462;  $P=0.325$ ; Figure S1B).

The MRD-negativity rate in 2L patients at the confirmation-of-response visit (intent-to-treat [ITT] population) was similar in the two arms (9% for both; Table S4), but patient numbers were low.



**Table S1. Demographic characteristics for the pooled 1L and 2L patients.**

|                                                  | <b>R-B<br/>(N=178)</b> | <b>R-C1b<br/>(N=179)</b> |
|--------------------------------------------------|------------------------|--------------------------|
| Age (years)                                      |                        |                          |
| Median, (min, max)                               | 73 (41, 88)            | 72 (38, 91)              |
| Gender, n (%)                                    |                        |                          |
| Male                                             | 105 (59)               | 118 (66)                 |
| Female                                           | 73 (41)                | 61 (34)                  |
| Patients receiving concomitant medication, n (%) | 171 (96)               | 168 (94)                 |
| Number of active medical conditions              |                        |                          |
| Median (min, max)                                | 3 (0, 12)              | 3 (0, 18)                |
| Binet stage, n (%)                               |                        |                          |
| A                                                | 10 (6)                 | 14 (8)                   |
| B                                                | 102 (57)               | 95 (53)                  |
| C                                                | 61 (34)                | 66 (37)                  |
| Missing                                          | 5 (3)                  | 4 (2)                    |
| ECOG PS, n (%)                                   |                        |                          |
| 0                                                | 88 (49)                | 84 (47)                  |
| 1                                                | 74 (42)                | 82 (46)                  |
| 2                                                | 14 (8)                 | 11 (6)                   |
| Missing                                          | 2 (1)                  | 2 (1)                    |
| Body surface area, m <sup>2</sup>                |                        |                          |
| Mean (SD)                                        | 1.802 (0.2365)         | 1.809 (0.1722)           |
| Min, max                                         | 1.30, 2.48             | 1.41, 2.29               |
| IgVH mutational status, n (%)                    |                        |                          |
| Mutated                                          | 59 (33)                | 71 (40)                  |
| Unmutated                                        | 106 (60)               | 91 (51)                  |
| Other <sup>a</sup>                               | 3 (2)                  | 8 (5)                    |
| Not tested                                       | 10 (6)                 | 9 (5)                    |
| 11q status, n (%)                                |                        |                          |
| Heterozygous deletion                            | 33 (19)                | 27 (15)                  |
| Normal                                           | 144 (81)               | 149 (83)                 |
| Not tested                                       | 1 (1)                  | 3 (2)                    |

|                                                       |          |          |
|-------------------------------------------------------|----------|----------|
| 17p status, n (%)                                     |          |          |
| Heterozygous deletion                                 | 19 (11)  | 6 (3)    |
| Normal                                                | 158 (89) | 169 (94) |
| Not tested                                            | 1 (1)    | 4 (2)    |
| 11q/17p deletion, n (%)                               |          |          |
| Heterozygous deletion                                 | 48 (27)  | 32 (18)  |
| Normal                                                | 129 (73) | 144 (80) |
| Not tested                                            | 1 (1)    | 3 (2)    |
| 13q deletion (S25 or S319 probe) <sup>b</sup> , n (%) |          |          |
| Homozygous deletion                                   | 7 (4)    | 8 (5)    |
| Two clones (one heterozygote, one homozygote)         | 21 (12)  | 11 (6)   |
| Heterozygote deletion                                 | 63 (35)  | 90 (50)  |
| Normal                                                | 86 (48)  | 67 (37)  |
| Not tested                                            | 1 (1)    | 3 (2)    |
| Trisomy 12, n (%)                                     |          |          |
| Normal                                                | 135 (76) | 144 (80) |
| Trisomy                                               | 41 (23)  | 32 (18)  |
| Not tested                                            | 1 (1)    | 3 (2)    |

---

1L: first-line; 2L: second-line; ECOG PS: Eastern Cooperative Oncology Group performance status;

IgVH: immunoglobulin variable-region heavy chain; R-B: rituximab plus bendamustine; R-Clb:

rituximab plus chlorambucil; SD: standard deviation. <sup>a</sup>Other includes polyclonal and oligoclonal.

<sup>b</sup>Deletion status according to at least one probe (NB, in the R-B group, one patient with two clones by S319 probe and heterozygous deletion by S25 probe is counted twice).

**Table S2. Active medical conditions in 1L patients.**

| <b>&gt;5% patients by SOC, n (%)</b>                 | <b>R-B<br/>(N=121)</b> | <b>R-Clb<br/>(N=120)</b> |
|------------------------------------------------------|------------------------|--------------------------|
| Vascular disorders                                   | 62 (51)                | 56 (47)                  |
| Metabolism and nutrition disorders                   | 42 (35)                | 47 (39)                  |
| Respiratory, thoracic and mediastinal disorders      | 25 (21)                | 28 (23)                  |
| Musculoskeletal and connective tissue disorders      | 25 (21)                | 26 (22)                  |
| Social circumstances                                 | 32 (26)                | 17 (14)                  |
| Cardiac disorders                                    | 27 (22)                | 21 (18)                  |
| Gastrointestinal disorders                           | 23 (19)                | 23 (19)                  |
| Blood and lymphatic system disorders                 | 24 (20)                | 17 (14)                  |
| Psychiatric disorders                                | 19 (16)                | 18 (15)                  |
| Renal and urinary disorders                          | 18 (15)                | 17 (14)                  |
| General disorders and administration site conditions | 11 (9)                 | 16 (13)                  |
| Nervous system disorders                             | 14 (12)                | 12 (10)                  |
| Investigations                                       | 12 (10)                | 10 (8)                   |
| Reproductive system and breast disorders             | 7 (6)                  | 15 (13)                  |
| Infections and infestations                          | 12 (10)                | 9 (8)                    |
| Endocrine disorders                                  | 9 (7)                  | 10 (8)                   |
| Neoplasms benign, malignant and unspecified          | 12 (10)                | 7 (6)                    |
| Skin and subcutaneous tissue disorders               | 6 (5)                  | 12 (10)                  |
| Eye disorders                                        | 8 (7)                  | 7 (6)                    |
| Ear and labyrinth disorders                          | 6 (5)                  | 7 (6)                    |

1L: first-line; R-B: rituximab plus bendamustine; R-Clb: rituximab plus chlorambucil; SOC: System Organ Class.

**Table S3. CRs and PRs at C6 in 2L patients and for the pooled 1L and 2L patients.**

| Assessment                                | Analysis                         |                              | 2L patients         |         | All study patients |          |
|-------------------------------------------|----------------------------------|------------------------------|---------------------|---------|--------------------|----------|
|                                           |                                  |                              | R-B                 | R-CIb   | R-B                | R-CIb    |
| CR confirmed by BM biopsy <sup>a</sup>    | CR                               | N                            | 57                  | 59      | 178                | 179      |
|                                           |                                  | n (%)                        | 9 (16)              | 1 (2)   | 38 (21)            | 12 (7)   |
|                                           |                                  | <i>P</i> -value <sup>b</sup> | 0.008               |         | <0.001             |          |
|                                           | Logistic regression <sup>c</sup> | N                            | 49                  | 56      | 162                | 159      |
|                                           |                                  | OR (95% CI)                  | 14.00 (1.67-117.58) |         | 5.27 (2.42-11.48)  |          |
|                                           |                                  | <i>P</i> -value <sup>d</sup> | 0.015               |         | <0.001             |          |
| PR based on the investigator's assessment | PR                               | N                            | 57                  | 59      | 178                | 179      |
|                                           |                                  | n (%)                        | 22 (39)             | 30 (51) | 88 (49)            | 109 (61) |

1L: first-line; 2L: second-line; BM: bone marrow; C: cycle; CI: confidence interval; CR: complete response; ECOG PS: Eastern Cooperative Oncology Group performance status; IgVH: immunoglobulin variable-region heavy chain; OR: odds ratio; PR: partial response; R-B: rituximab plus bendamustine; R-CIb: rituximab plus chlorambucil. <sup>a</sup>CRs confirmed by BM biopsy only were included. <sup>b</sup>*P*-value is based on a one-sided continuity corrected chi-square test for all patients and two-sided Fisher's exact test for 2L patients. <sup>c</sup>The following covariates were included in the logistic regression: Binet stage (A and B vs. C); IgVH mutational status (mutated vs. unmutated); 17p/11q deletion (heterozygote deletion vs. normal); ECOG PS (0 vs. ≥1). <sup>d</sup>*P*-value is based on the Wald test.

**Table S4. MRD at the confirmation-of-response visit<sup>a</sup> in 2L patients.**

|                                                                            | <b>R-B</b> | <b>R-C1b</b> |
|----------------------------------------------------------------------------|------------|--------------|
| Overall ITT population                                                     | (n=57)     | (n=59)       |
| MRD-negative patients, n (%)                                               | 5 (9)      | 5 (9)        |
| Patients with CR                                                           | (n=9)      | (n=1)        |
| MRD-negative patients, n (%)                                               | 2 (22)     | 0 (0)        |
| Patients with CR or PR based on the investigator's assessment <sup>b</sup> | (n=31)     | (n=31)       |
| MRD-negative patients, n (%)                                               | 5 (16)     | 4 (13)       |

2L: second-line; ASO-RQ-PCR: allele-specific oligonucleotide real-time quantitative polymerase chain reaction assay; BM: bone marrow; C: cycle; CR: complete response; CR: complete response ITT: intent-to-treat; MRD: minimal residual disease; PB: peripheral blood; PR: partial response; R-B: rituximab plus bendamustine; R-C1b: rituximab plus chlorambucil. Negative MRD was defined as proportion of malignant B-cells to white blood cells of  $<10^{-4}$ , as assessed by ASO-RQ-PCR measured in BM aspirate (or PB if BM unavailable). MRD data were available for 45/50 patients with a CR based on the investigator's assessment (BM, n=42; PB, n=1; unknown=2) and 182/241 patients overall (BM=145; PB, n=32; unknown=5). <sup>a</sup>Performed 12 weeks after the end of C6 disease response assessment. <sup>b</sup>Includes patients with CR (with or without BM confirmation) or PR by investigator assessment.

**Figure S1. Efficacy in 2L patients, (A) PFS and (B) OS.** 2L: second-line; CI: confidence interval; HR: hazard ratio; NR: not reached; OS: overall survival; PFS: progression-free survival; R-B: rituximab plus bendamustine; R-Clb: rituximab plus chlorambucil.

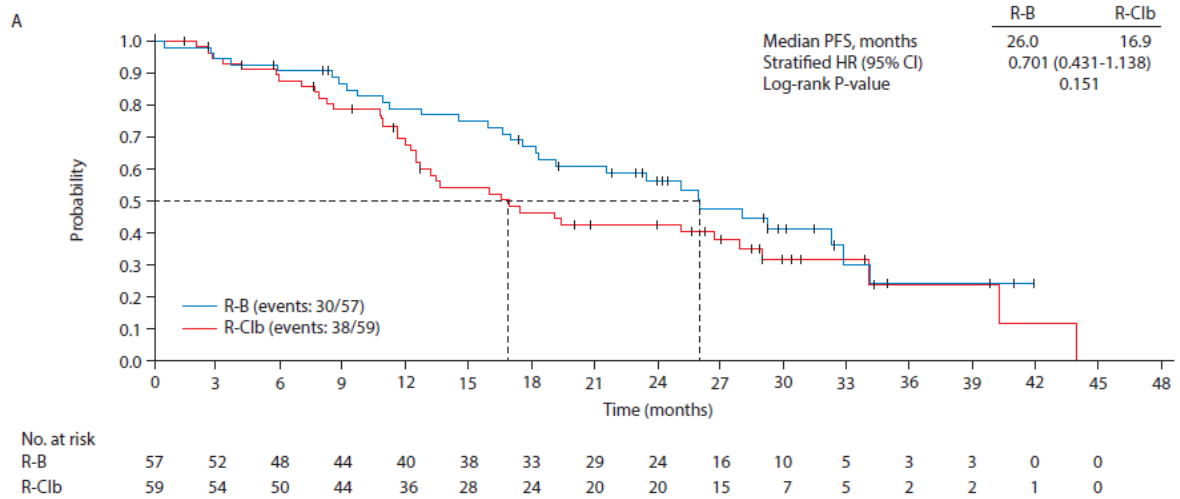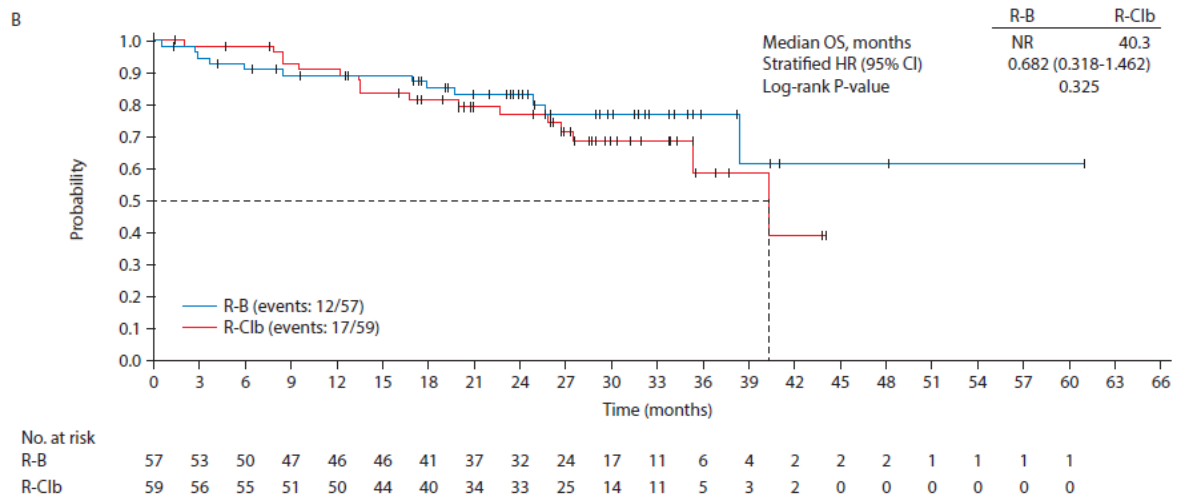

Supplement: 2017.170480.MICHALLET_SUPPL.pdf [file 2017.170480.MICHALLET_SUPPL.pdf]
