# Supplementary material for: Rituximab plus bendamustine or chlorambucil for chronic lymphocytic leukemia: primary analysis of the randomized, open-label MABLE study
Source: PubMed Central journal article supplement — Haematologica. 2018 Feb 1;103(4):698–706. doi: 10.3324/haematol.2017.170480 (PMC5865431; doi:10.3324/haematol.2017.170480), 2018-04
Supplement: HAEMATOL-2017-170480v3-Michallet_v2-01.pdf [file HAEMATOL-2017-170480v3-Michallet_v2-01.pdf]

# Comparison between bendamustine and chlorambucil in combination with rituximab in patients with chronic lymphocytic leukemia ineligible for fludarabine-based therapy

 Fludarabine-ineligible patients with chronic lymphocytic leukemia (CLL)

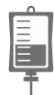

6 cycles of chemotherapy treatment for 4 weeks

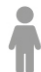

178

**Rituximab**

375 mg/m<sup>2</sup> D1, C1  
500 mg/m<sup>2</sup> D2, C2-C6

+

**Bendamustine**

VS

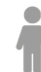

179

**Rituximab**

375 mg/m<sup>2</sup> D1, C1  
500 mg/m<sup>2</sup> D2, C2-C6

+

**Chlorambucil**

**1L patients**

90 mg/m<sup>2</sup> D1 and D2, C1-C6 (n=121)

**2L patients**

70 mg/m<sup>2</sup> D1 and D2, C1-C6 (n=57)

10 mg/m<sup>2</sup> D1-D7, C1-C6 (n=120)

Chlorambucil monotherapy for  
additional ≤6 cycles (n=59)

## Primary endpoint (1L)

Complete response rate

24% (9/121)

9% (11/120)

P=0.002

## Secondary endpoint (1L)

Progression-free survival

39.6 months

29.9 months

Log-rank P=0.003

Overall survival

43.8 months

not reached

Log-rank P=0.939

MRD-negative patients

41% (49/121)

13% (16/120)

Safety

98% (173/178)

97% (173/179)

**Rituximab plus bendamustine may be a valuable first-line option for fludarabine-ineligible patients with CLL**
